# Supplementary material for: The F-box protein Slmb restricts the activity of aPKC to polarize epithelial cells
Source: Oxford University Press journal article supplement (doi:10.1242/dev.109694), 2014-07-22
Supplement: dev109694_supp.pdf [file dev109694_supp.pdf]

## SUPPLEMENTARY MATERIALS AND METHODS

### Fly stocks and genetics

Mutants used included *slmb*<sup>1</sup>, *slmb*<sup>2</sup>, *slmb*<sup>8</sup>, *dlg*<sup>40-2</sup>, *Roc1a*<sup>G1</sup>, *AP-2sigma* and *yki*<sup>B5</sup> (described in FlyBase). Transgenes included *tub>slmb-myc* (Ko et al., 2002), *UAS-Ci*<sup>M1-4</sup> (Chen et al., 1999), *UAS-Arm*<sup>S10</sup> (Pai et al., 1997), *UAS-Plk4*<sup>SBM</sup> (Rogers et al., 2009), *UAS-CapH2*<sup>SBM</sup> (Buster et al., 2013), *UAS-Par1*<sup>T408A</sup> (Lee et al., 2012), *UAS-aPKC*<sup>CAAX-DN</sup> (Sotillos et al., 2004) and *UAS-aPKC*<sup>SN</sup> (Betschinger et al., 2003) driven by *MS1096-GAL4*, as well as *hs-Wls-V5* and *UAS-Wls-V5* (Belenkaya et al., 2008). Entirely mutant wing discs were generated using *UbxFLP/FM7; cl FRT82B/TM6B* and entirely mutant eye discs were generated using *eyFLP cl GMRhid FRT82B/TM6B*. MARCM clones in the eye and neuroblast were generated with *eyFLP* and *hsFLP* stocks, respectively. Follicle cell clones were generated as described (Lu and Bilder, 2005).

### Immunohistochemistry

The following primary antibodies were used: mouse anti-Mmp1 (1/100), mouse anti-Arm (N27A1, 1/100), mouse anti-Dlg (4F3, 1/100), mouse anti-Coracle (1/100), mouse anti-FasIII (7G10, 1/20), mouse anti-Notch<sup>ECD</sup> (C458.2H, 1/50), mouse anti-Lamin (1/100), rat anti-Elav (9F8A9, 1/50) (all from Developmental Studies Hybridoma Bank, see references therein), rat anti-Crb (1/750; U. Tepass, E. Knust), guinea pig anti-Cad87E (1/1000; U. Tepass), guinea pig anti-Scrib (1/200), rabbit anti-PKCζ (sc-216, Santa Cruz Biotechnology, 1/200), rabbit anti-Miranda (1/500), mouse anti-Prospero (1/100). TRITC-phalloidin was used to visualize F-actin (1/400, Sigma) and either TO-PRO-3 (1/400) or DAPI (1/3000) was used to visualize DNA. Secondary antibodies were from Molecular Probes.

### Supplementary references

**Belenkaya, T. Y., Wu, Y., Tang, X., Zhou, B., Cheng, L., Sharma, Y. V., Yan, D., Selva, E. M. and Lin, X.** (2008). The retromer complex influences Wnt secretion by recycling wntless from endosomes to the trans-Golgi network. *Dev Cell* **14**, 120–131.

**Betschinger, J., Mechtler, K. and Knoblich, J. A.** (2003). The Par complex directs asymmetric cell division by phosphorylating the cytoskeletal protein Lgl. *Nature* **422**, 326–330.

**Buster, D. W., Daniel, S. G., Nguyen, H. Q., Windler, S. L., Skwarek, L. C., Peterson, M., Roberts, M., Meserve, J. H., Hartl, T., Klebba, J. E., et al.** (2013). SCFSlimb ubiquitin ligase suppresses condensin II-mediated nuclear reorganization by degrading Cap-H2. *J. Cell Biol.* **201**, 49–63.

**Chen, Y., Cardinaux, J. R., Goodman, R. H. and Smolik, S. M.** (1999). Mutants of cubitus interruptus that are independent of PKA regulation are independent of hedgehog signaling. *Development* **126**, 3607–3616.

**Ko, H. W., Jiang, J. and Edery, I.** (2002). Role for Slimb in the degradation of Drosophila Period protein phosphorylated by Doubletime. *Nature* **420**, 673–678.

- Lee, S., Wang, J.-W., Yu, W. and Lu, B.** (2012). Phospho-dependent ubiquitination and degradation of PAR-1 regulates synaptic morphology and tau-mediated A $\beta$  toxicity in *Drosophila*. *Nature Communications* **3**, 1312–12.
- Lu, H. and Bilder, D.** (2005). Endocytic control of epithelial polarity and proliferation in *Drosophila*. *Nat. Cell Biol.* **7**, 1232–1239.
- Pai, L. M., Orsulic, S., Bejsovec, A. and Peifer, M.** (1997). Negative regulation of Armadillo, a Wingless effector in *Drosophila*. *Development* **124**, 2255–2266.
- Rogers, G. C., Rusan, N. M., Roberts, D. M., Peifer, M. and Rogers, S. L.** (2009). The SCF Slimb ubiquitin ligase regulates Plk4/Sak levels to block centriole reduplication. *J. Cell Biol.* **184**, 225–239.
- Sotillos, S., Diaz-Meco, M. T., Caminero, E., Moscat, J. and Campuzano, S.** (2004). DaPKC-dependent phosphorylation of Crumbs is required for epithelial cell polarity in *Drosophila*. *J. Cell Biol.* **166**, 549–557.

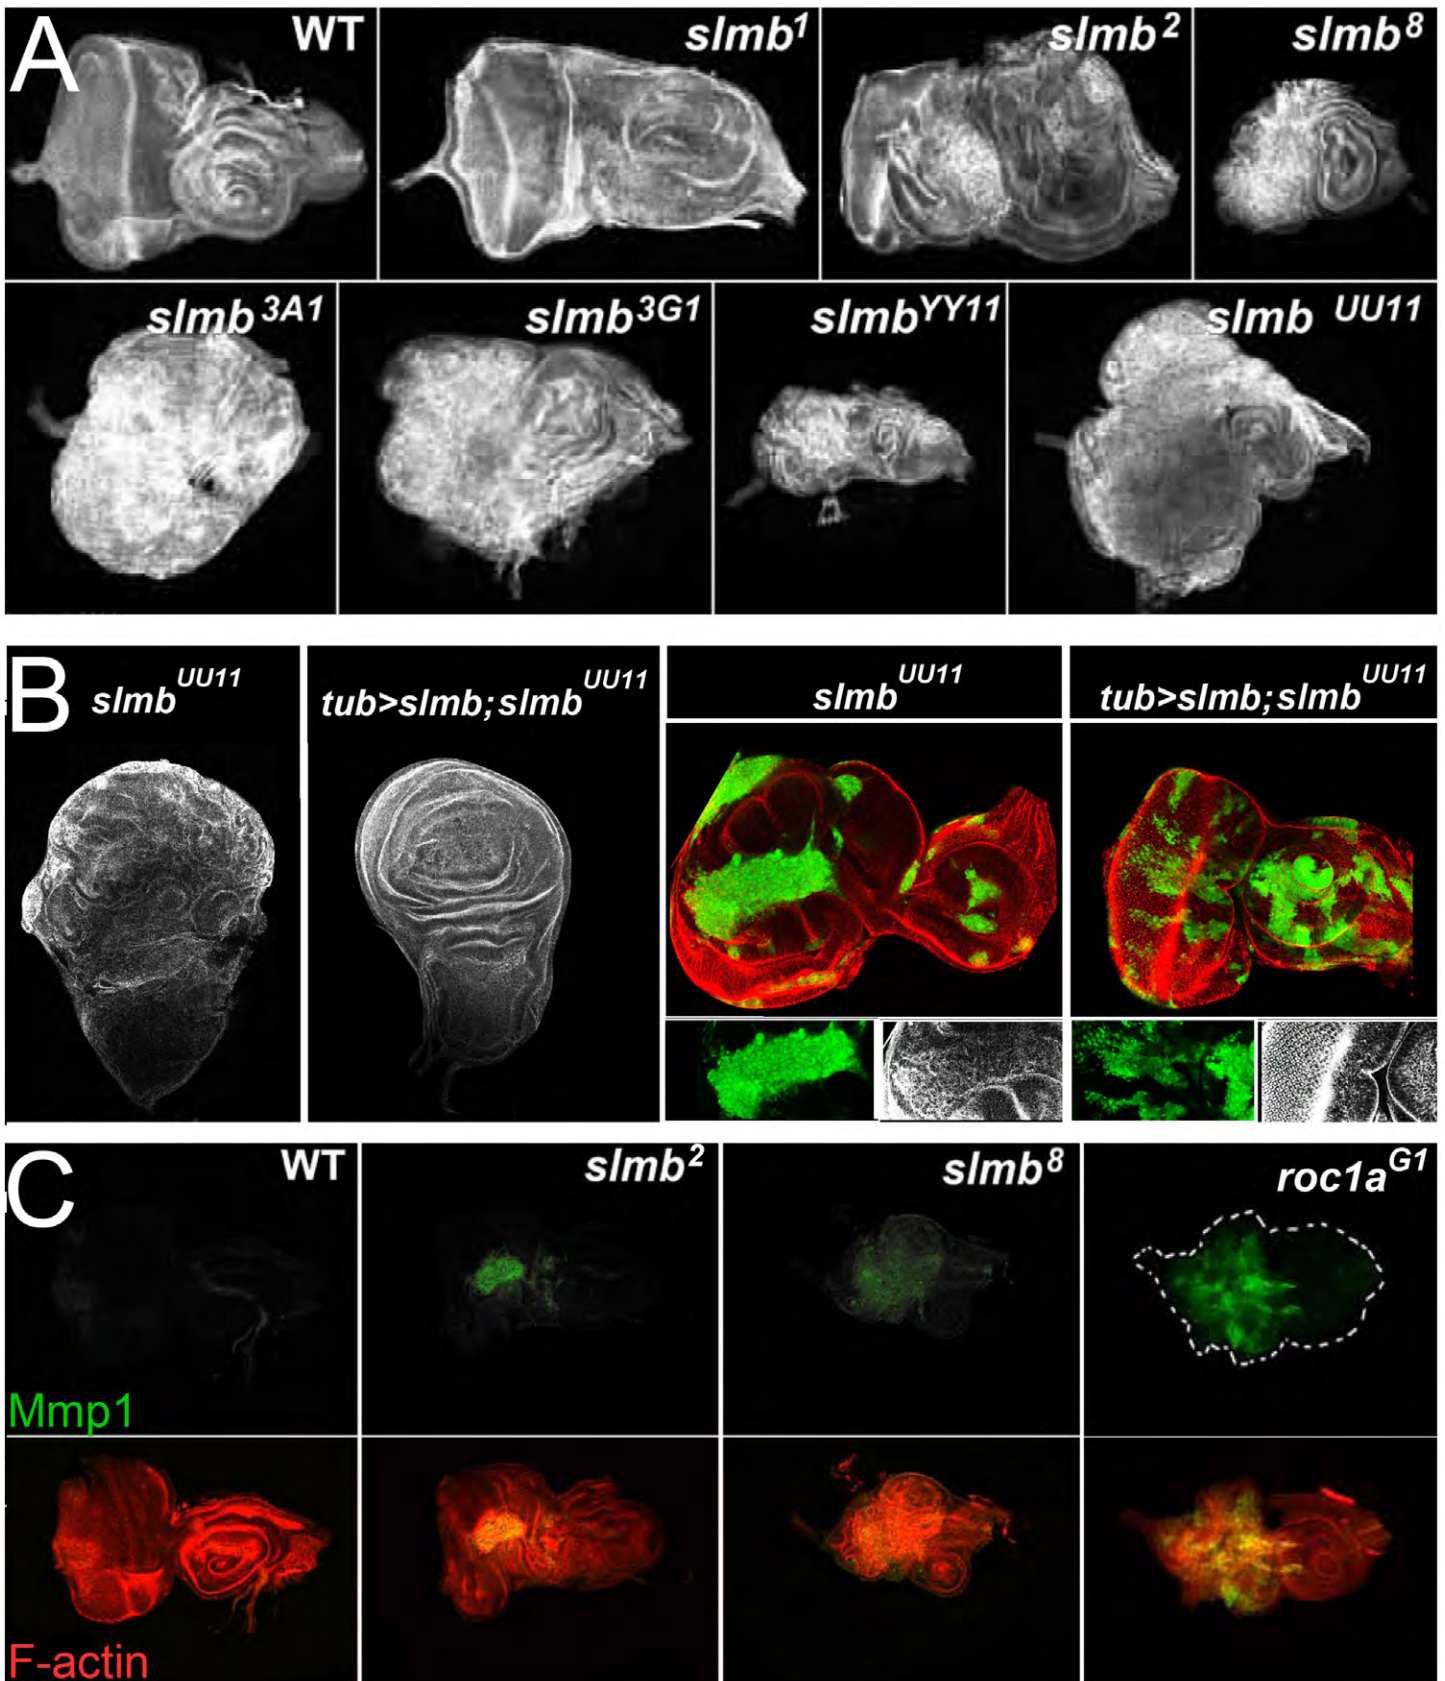

**Supplementary Figure 1. Analysis of *slmb* allelic series.** (A) Phalloidin staining of *slmb* mutant eye discs demonstrates that strong alleles show the most severe neoplastic transformation. (B) A *slmb* transgene rescues the neoplastic phenotypes of *UU11* in predominantly mutant wing discs and GFP-marked eye disc mosaics. (C) Discs derived from the deletion allele *slmb*<sup>8</sup> and null mutation in the SCF core component *roc1a* also display hallmarks of neoplasia, including disrupted F-Actin and upregulation of Mmp1.



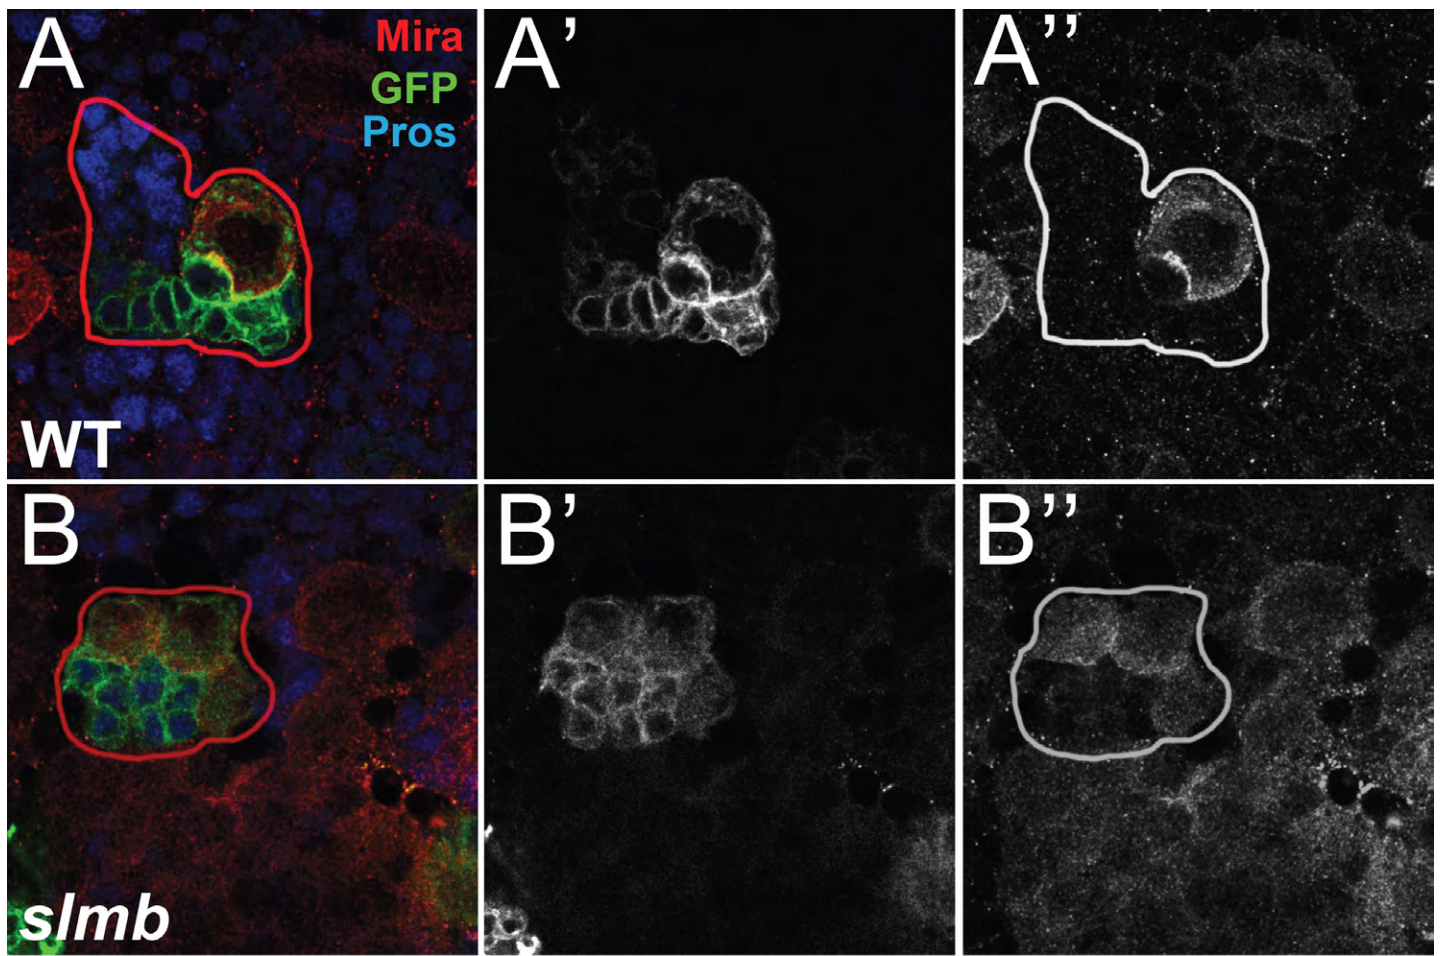

**Supplementary Figure 2. Effect of loss of *slmb* in neuroblasts.** (A, B) GFP marks clones generated using the MARCM system. Larval type I neuroblasts divide asymmetrically to produce a new Miranda-positive neuroblast (red) and a smaller ganglion mother cell that will differentiate into a neuron or glia (Prospero positive, blue). *slmb* mutant neuroblasts display defects in asymmetric cell division, with a fraction of clones containing multiple Miranda positive neuroblast-like cells.



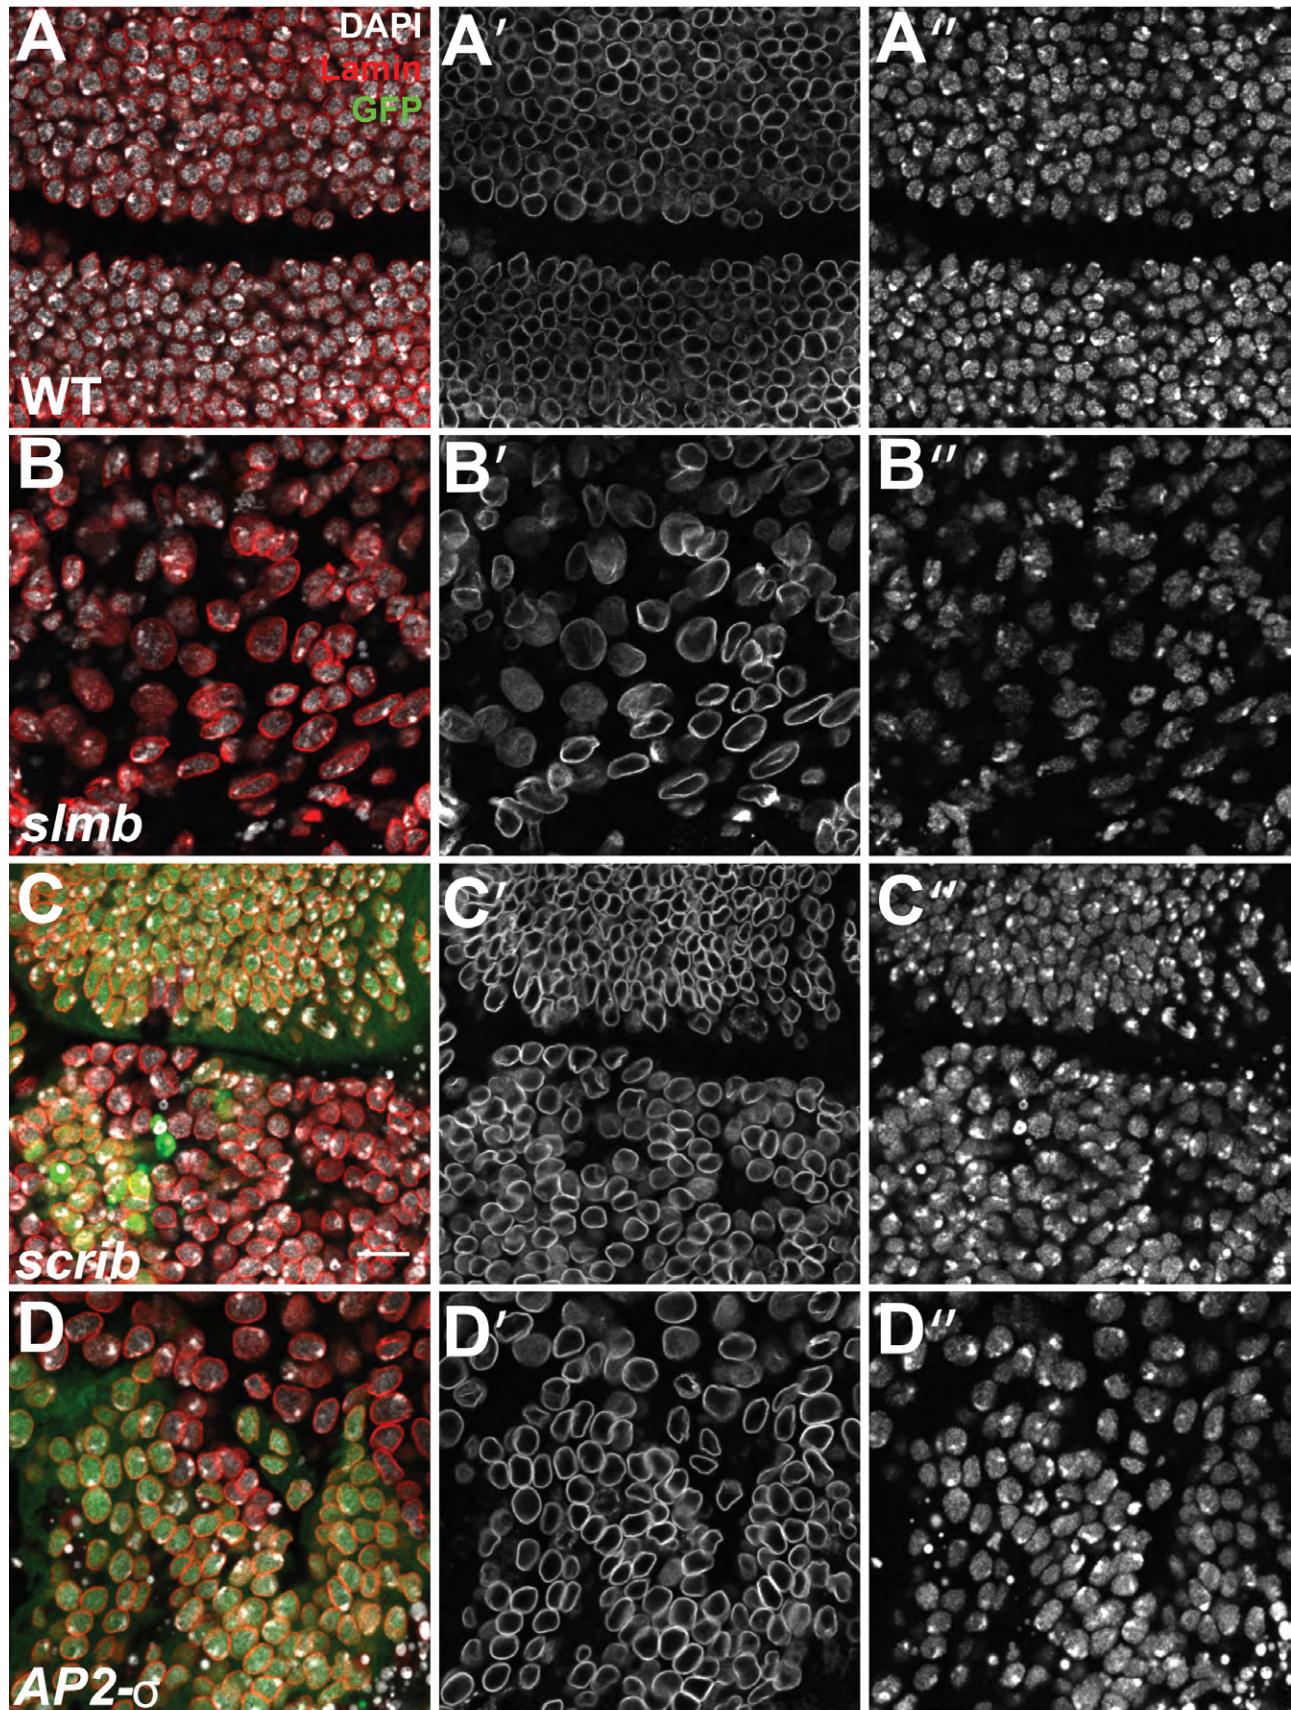

**Supplementary Figure 3. Junctional scaffold and endocytic class tumor suppressors do not regulate Slmb activity.** (A, B) Cells mutant for strong *slmb* alleles show chromosome condensation defects leading to a swollen nuclear lamina, reflecting misregulation of Condensin components. (C,D) In contrast, *scrib* and *AP2-sigma* mutant cells have WT nuclei and lamina size. Presence of GFP marks mutant cells. Scale, 10  $\mu$ m.

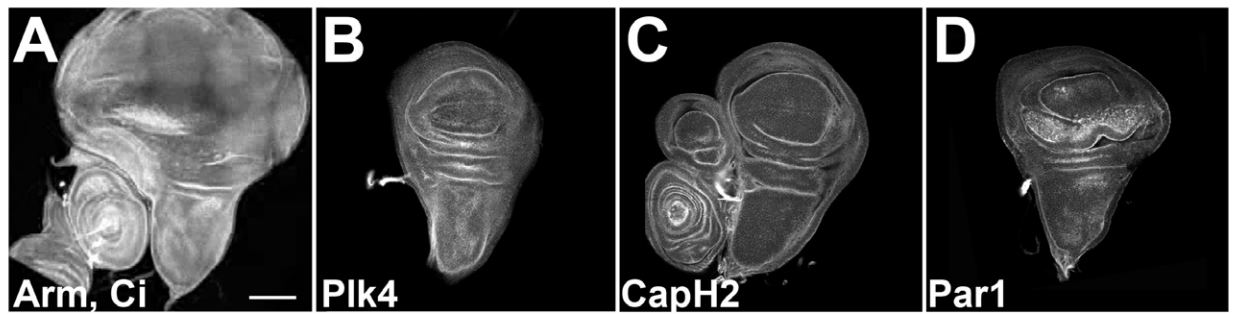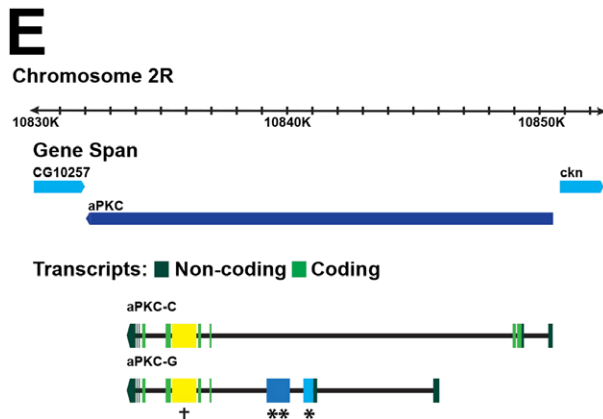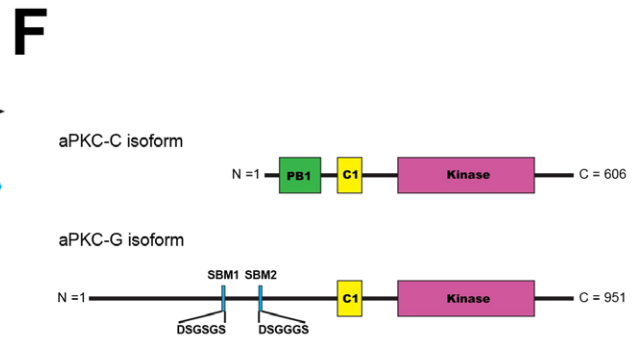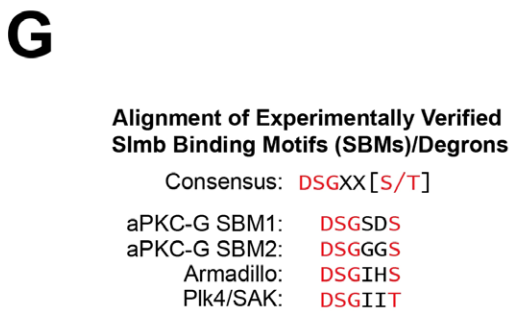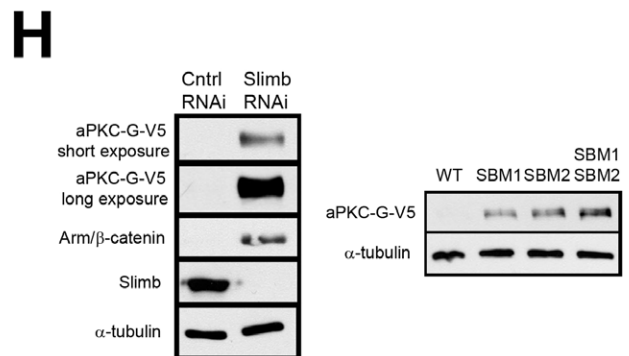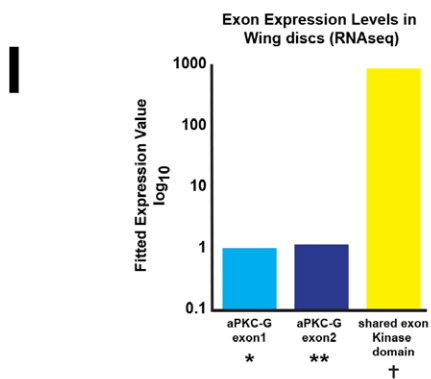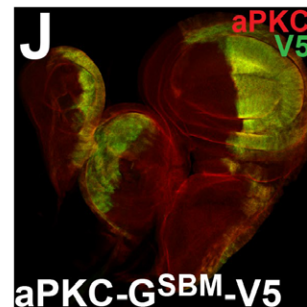

**Supplementary Figure 4. Misregulation of known substrates cannot account for the *slmb* phenotype.** (A-D) Overexpression of stabilized versions of known *Slmb* substrates throughout the presumptive wing pouch and notum using *MS-1096GAL4* does not phenocopy loss of *slmb*. (E, F) Gene and protein models comparing a common aPKC isoform C with the G isoform containing two *Slmb* binding motifs (SBM). (G) Alignment of aPKC-G SBMs with experimentally validated SBM degrons from other *Slmb* targets. (H) Western blots demonstrating that RNAi mediated knockdown of *slmb* in S2 cells results in stabilization of the aPKC-G isoform, as does mutation of the SBMs. (I) RNAseq data from third instar wing discs comparing levels of the unique aPKC-G exons with an exon encoding the shared Kinase domain; values shown are derived from RPKM. (J) Overexpression of a stabilized version of aPKC-G in the posterior domain of the wing disc (*en>GFP*, green) does not affect polarity or growth.
